# Supplementary material
Source: PubMed Central journal article supplement (PMC2908048)

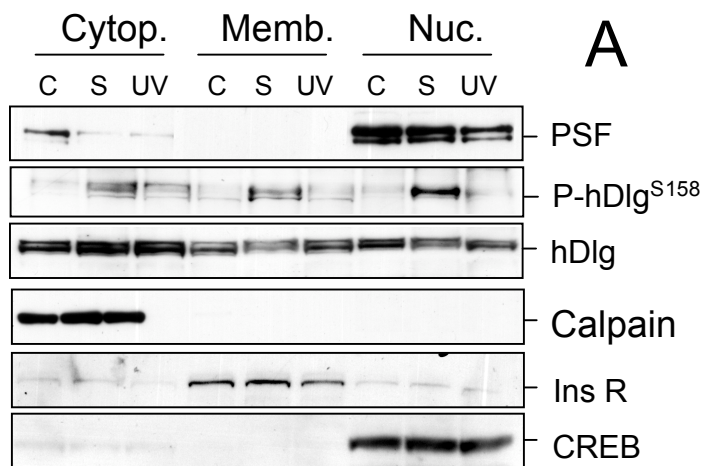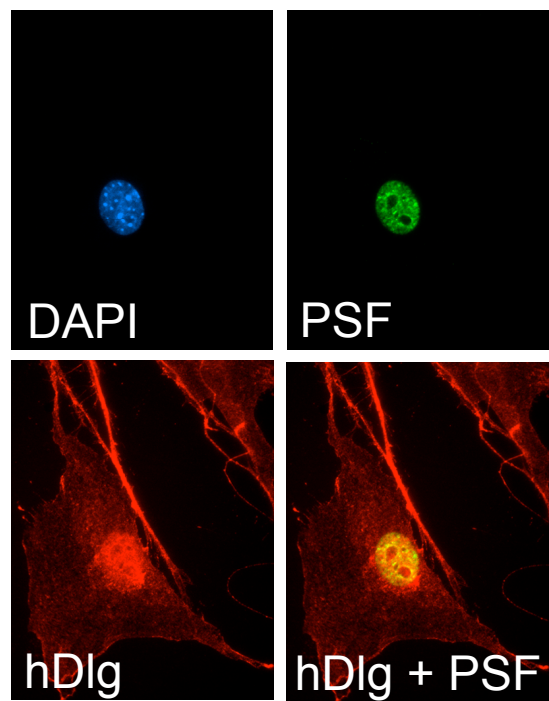

Supplement: jcs.066514_1.pdf [file jcs.066514_1.pdf]

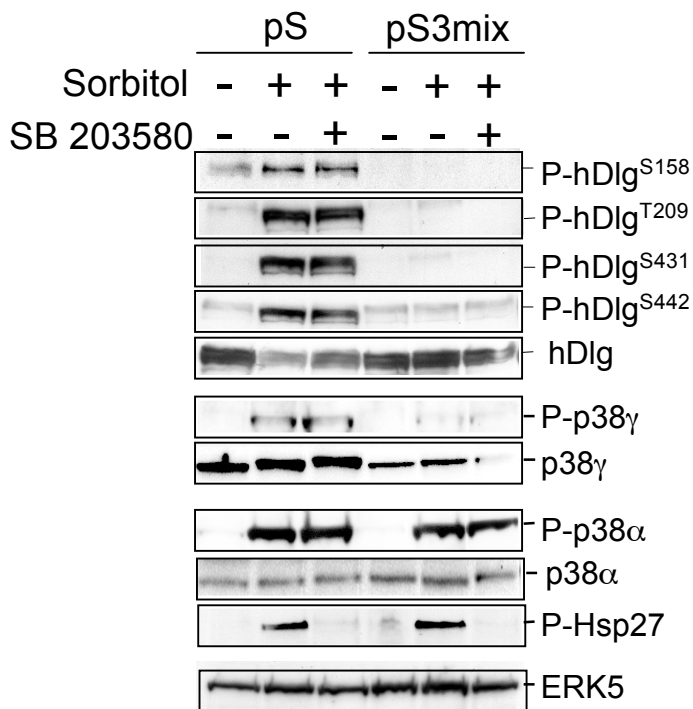

Supplement: jcs.066514_10.pdf [file jcs.066514_10.pdf]

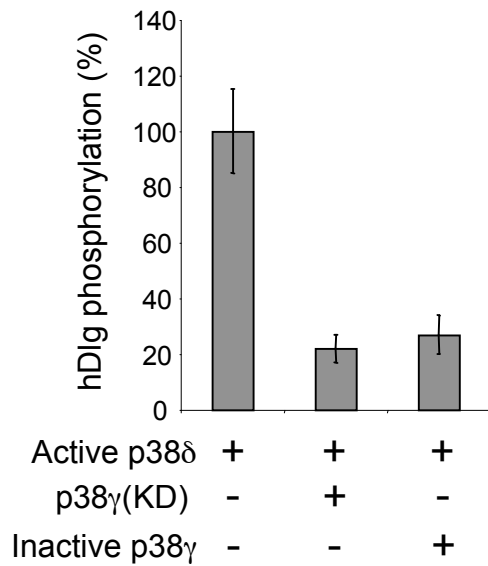

Supplement: jcs.066514_5.pdf [file jcs.066514_5.pdf]
